# Supplementary material
Source: PubMed Central journal article supplement (PMC3732181)
Supplement: NIHMS460657-supplement-Supp_Figs_1_and_2.pdf [file NIHMS460657-supplement-Supp_Figs_1_and_2.pdf]

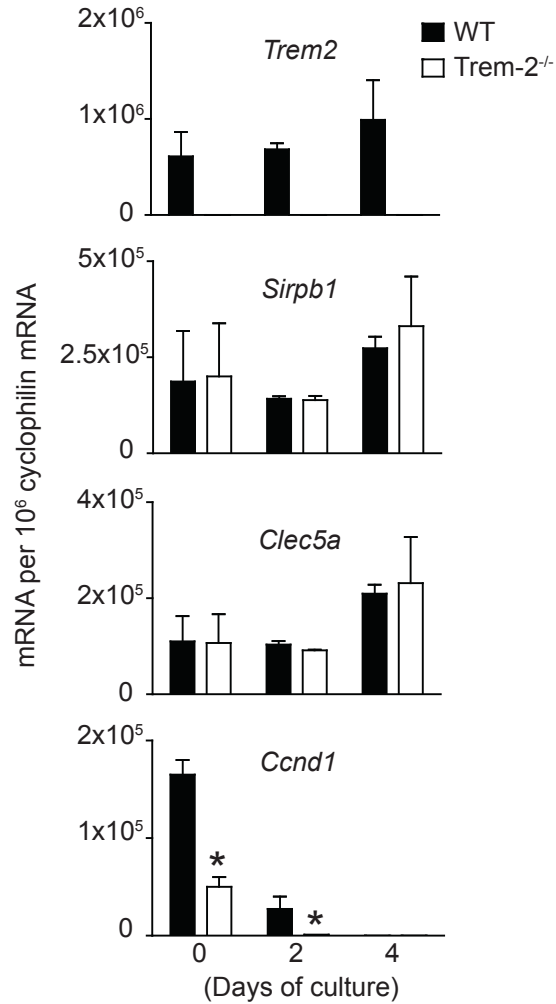

**Figure S1.** TREM2 deficiency reduces the expression of Cyclin D1 and does not modulate the expression of other DAP12-associated receptors *in vitro*.

OcP generated from WT and TREM2<sup>-/-</sup> mice were cultured *in vitro* with 10 ng/ml M-CSF and 100 ng/ml RANKL to generate multinuclear osteoclasts. The expression of TREM2 (*Trem2*), Sirpβ1 (*Sirpb1*), Clec5a (*Clec5a*) and Cyclin D1 (*Ccnd1*) at the mRNA level was assessed by Q-PCR. Results are representative of three different experiments.

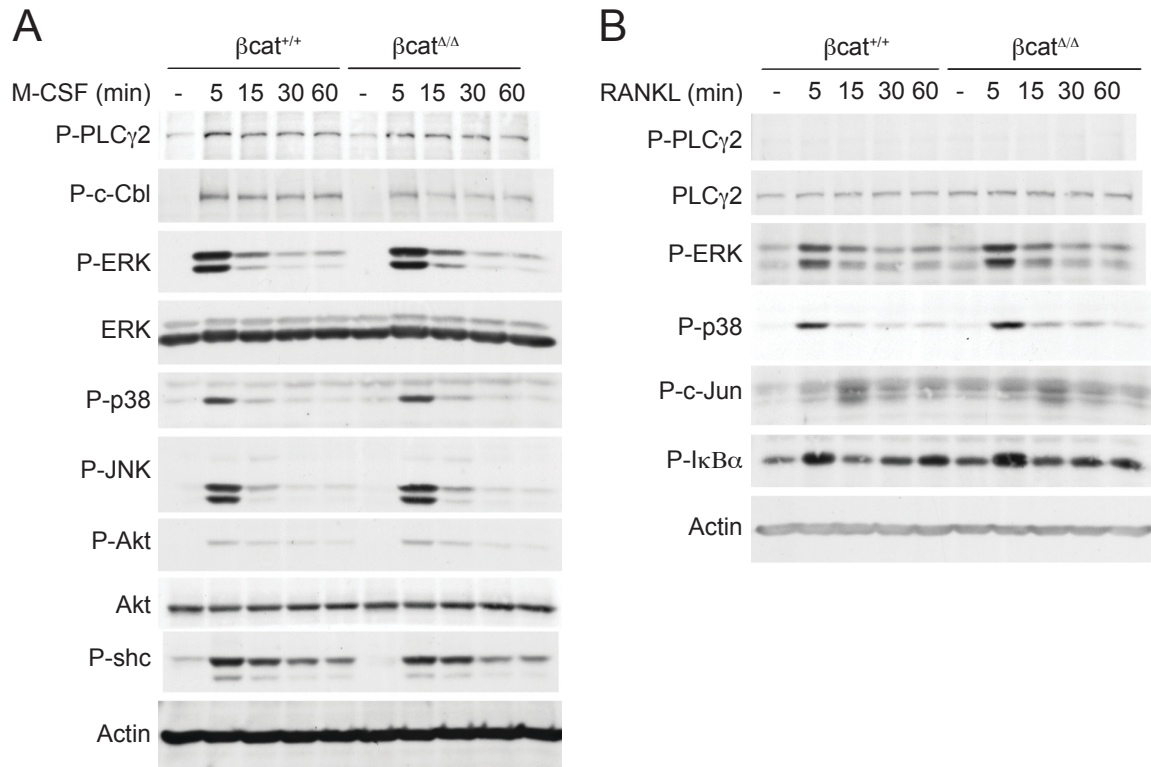

**Figure S2.**  $\beta$ -catenin deficiency does not affect M-CSF- and RANKL-induced signaling pathways in OcP. (A and B) OcP generated from control *LysM-Cre*<sup>+/+</sup>  $\beta$ -catenin<sup>+/+</sup> ( $\beta\text{cat}^{+/+}$ ) and *LysM-Cre*<sup>+/+</sup>  $\beta$ -catenin<sup>fl/fl</sup> ( $\beta\text{cat}^{\Delta/\Delta}$ ) mice were starved from M-CSF for 4 h and then exposed to 50 ng/ml M-CSF (A) or were starved from M-CSF and serum for 4 h and then exposed to 100 ng/ml RANKL (B). After the indicated times total cell lysates were prepared and subjected to immunoblotting analysis using antibodies to the indicated proteins. Actin served as loading control. Results are representative of at least three different experiments.
